# Supplementary material for: Electrochemical fabrication of electroactive ordered mesoporous electrode
Source: Royal Society of Chemistry journal article supplement (doi:10.1039/c2an36325a), 2013-01-01
Supplement: c2an36325a.pdf [file c2an36325a.pdf]

# Electrochemical fabrication of electroactive ordered mesoporous electrode

Mohammad Rafiee,<sup>\*a</sup> Babak Karimi,<sup>a</sup> Yousef Abdossalami Asl<sup>a</sup> and Hojatollah Vali<sup>b</sup>

<sup>a</sup> Department of Chemistry, Institute for Advanced Studies in Basic Sciences (IASBS),  
P.O.Box 45195-1159, Gava Zang, Zanjan, Iran

<sup>b</sup> Earth & Planetary Sciences, 3450 University St., Montreal, Quebec, H3A 2A7 Canada

\* E-mail: [rafiee@iasbs.ac.ir](mailto:rafiee@iasbs.ac.ir)

|                                                                                                 |     |
|-------------------------------------------------------------------------------------------------|-----|
| Figure 1S. Cyclic voltammograms of $\text{Fe}(\text{CN})_6^{3-}$ ...                            | S2  |
| Figure 2S. Cyclic voltammograms of $\text{Ru}(\text{NH}_3)_6^{3+}$ ...                          | S2  |
| Figure 3S. Side-view TEM images                                                                 | S3  |
| Figure 4S. Top-view TEM images                                                                  | S4  |
| Figure 5S. IR spectrum of scratched film                                                        | S4  |
| Figure 6S. The cathodic peak currents for the electrochemical functionalization at various pHs. | S5  |
| Figure 7S. The cathodic peak currents for methods of surfactant extraction                      | S5  |
| Figure 8S. The cathodic peak currents for electrochemical method of modification                | S6  |
| Figure 9S. The cathodic peak currents for the scan rate of modification                         | S6  |
| Figure 10S. The plot of cathodic peak current versus concentration of catechol                  | S7  |
| Figure 11S: Cyclic voltammogram of catechol on aminocatechol functionalized electrode           | S7  |
| Figure 12S: TGA of scratched amine functionalized silica thin film.                             | S8  |
| Figure 13S: TGA of scratched aminocatechol functionalized silica thin film                      | S8  |
| Figure 14S: The cyclic voltammograms of modified electrodes...                                  | S9  |
| Figure 15S. Multicyclic voltammograms of 1.0 mM catechol                                        | S9  |
| Figure 16S: Top-view TEM images of electrochemical functionalized film                          | S10 |
| Table 1S: the elemental analysis of scratched films                                             | S11 |

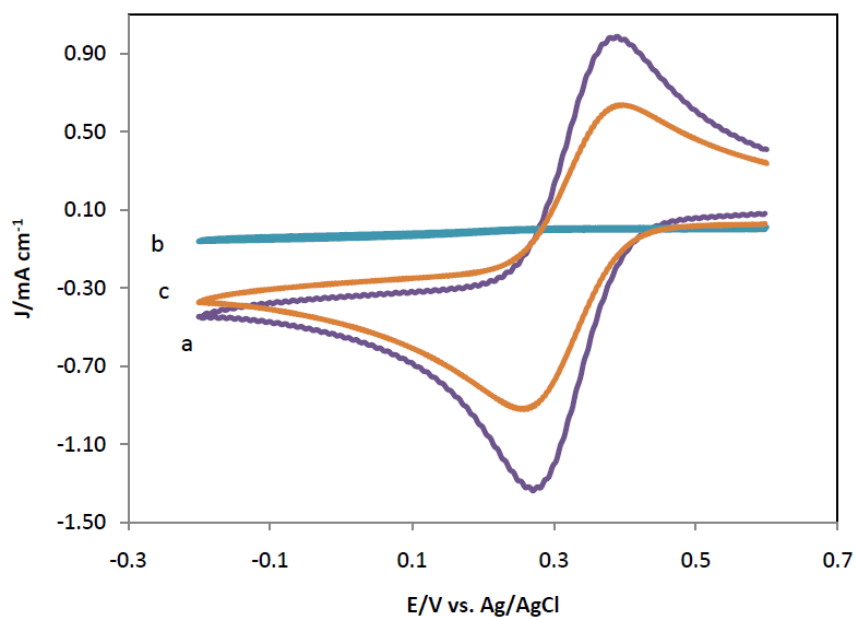

**Figure 1S.** Cyclic voltammograms of  $\text{Fe}(\text{CN})_6^{3-}$  (5 mM) on (a) bare GC electrode (b) covered by silica film before and (c) after surfactant extraction. Phosphate buffer solution pH 6, Scan rate:  $100 \text{ mVs}^{-1}$ .

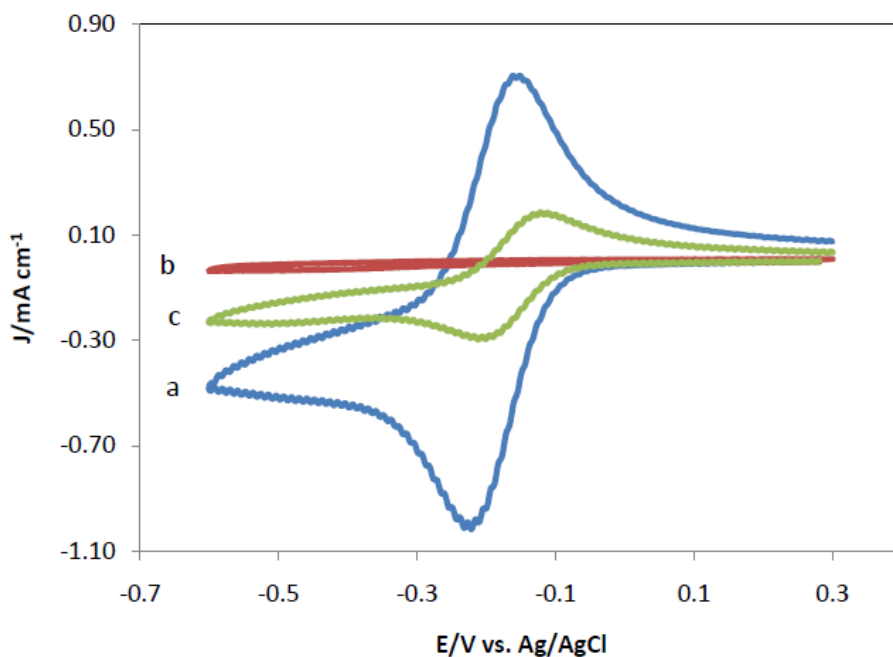

**Figure 2S.** Cyclic voltammograms of  $\text{Ru}(\text{NH}_3)_6^{3+}$  (5 mM) on (a) bare GC electrode (b) covered by silica film before and (c) after surfactant extraction. Phosphate buffer solution pH 6, Scan rate:  $100 \text{ mVs}^{-1}$ .

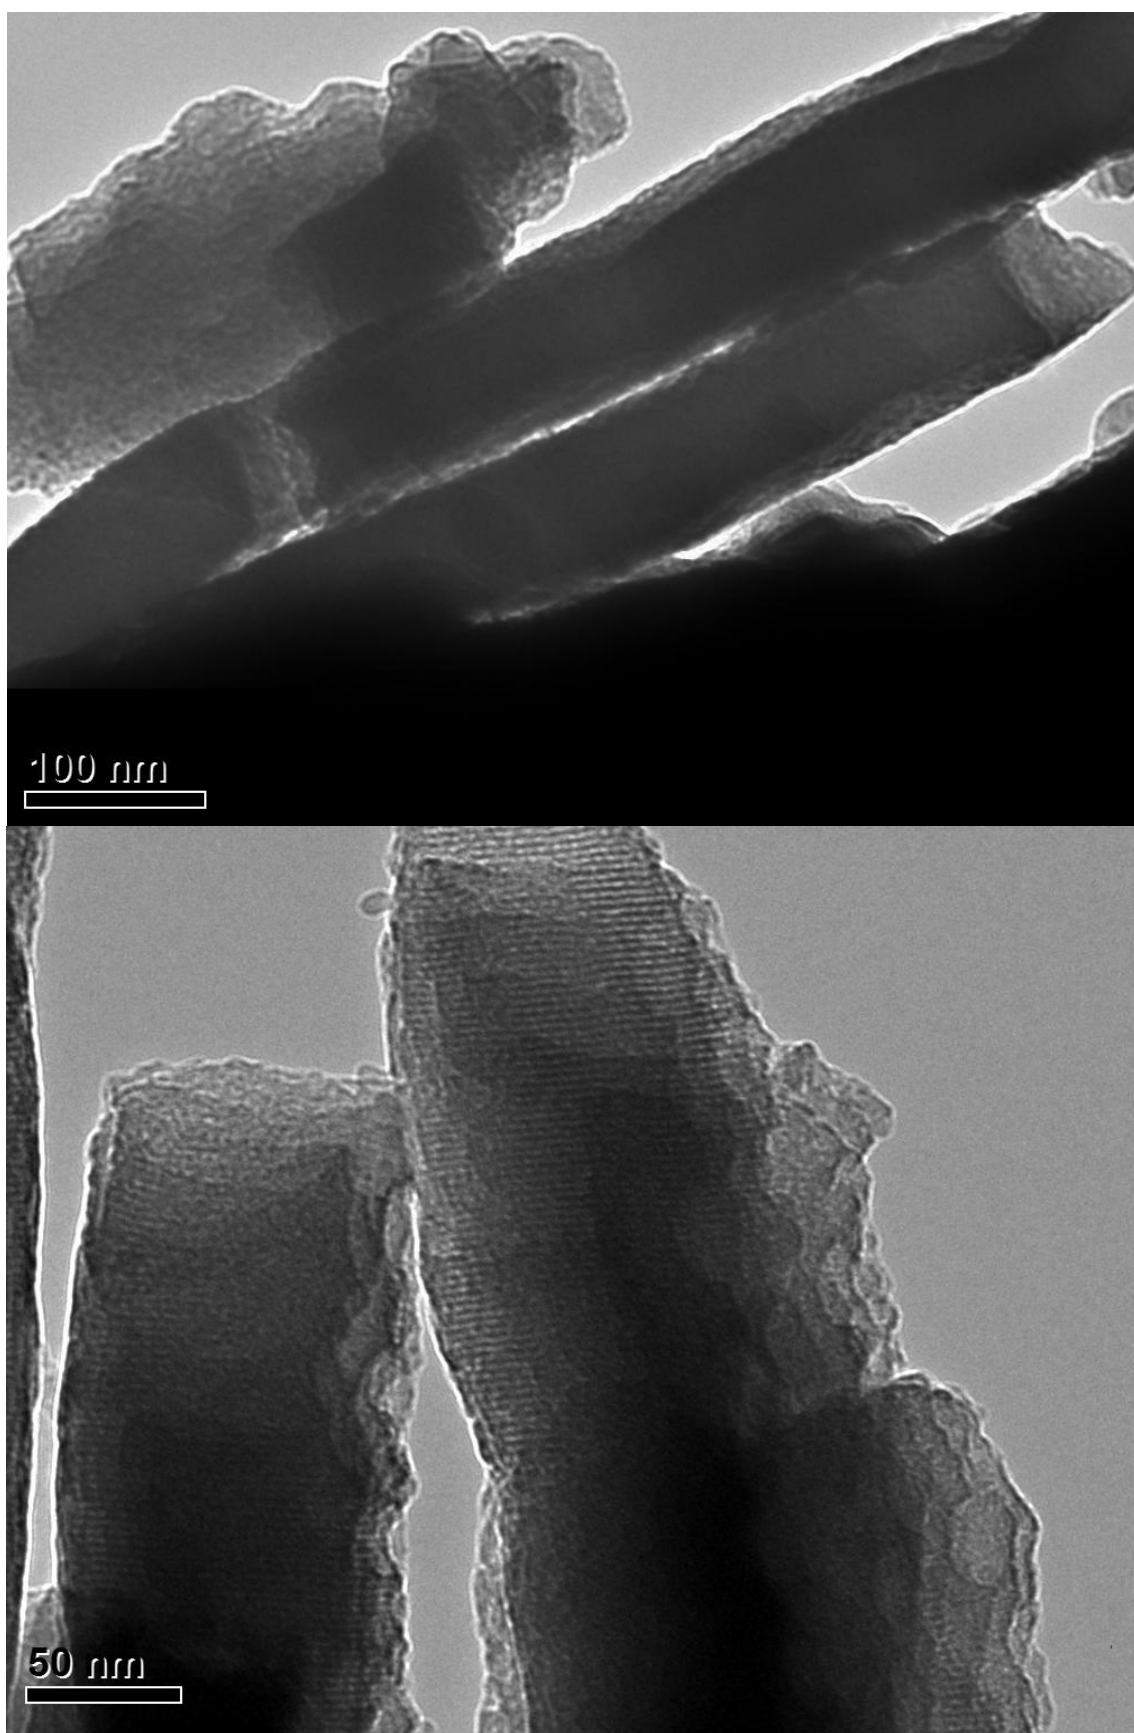

**Figure 3S.** Side-view TEM images of silica film correspond to a film deposited on GC at -2.2 V for 20 s from a sol containing the molar ratio for APTES to TEOS 0.1.

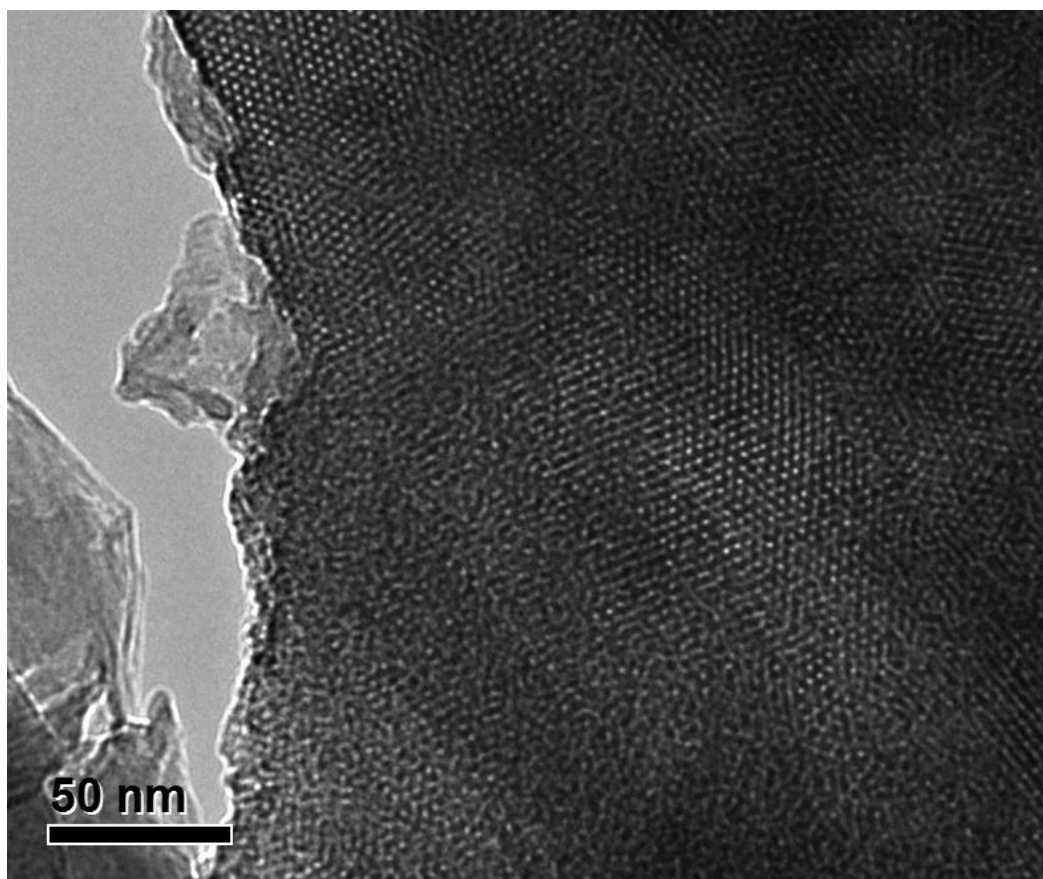

**Figure 4S.** Top-view TEM images of silica film correspond to a film deposited on GC at -2.2 V for 20 s from a sol containing the molar ratio for APTES to TEOS 0.1.

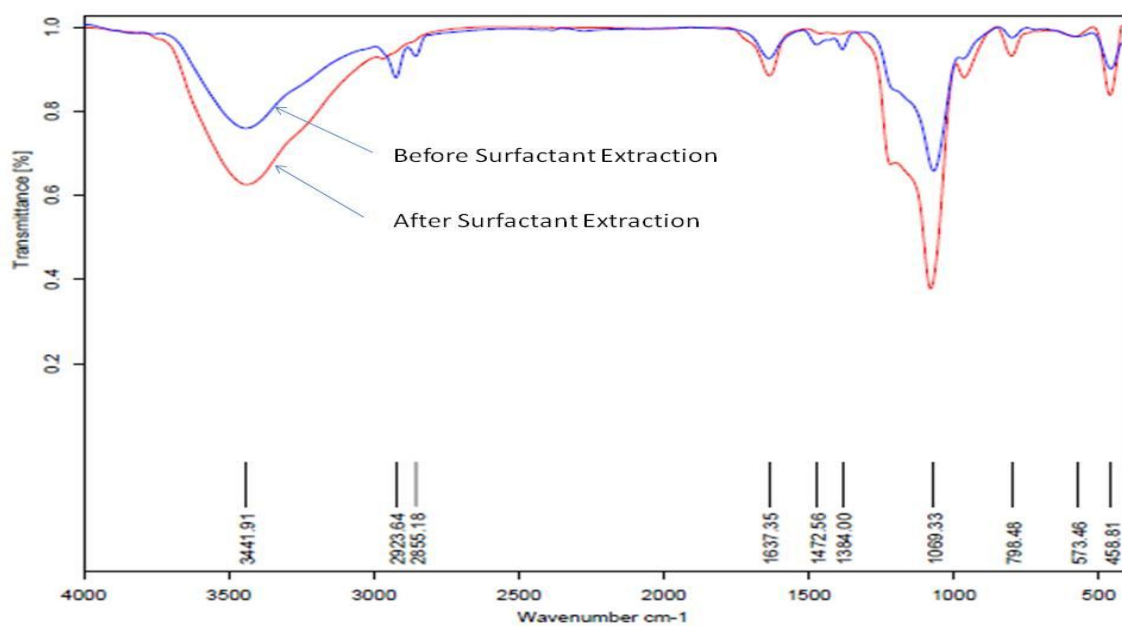

**Figure 5S.** IR spectrum of scratched aminopropyl functionalized film before and after extraction of CTAB.

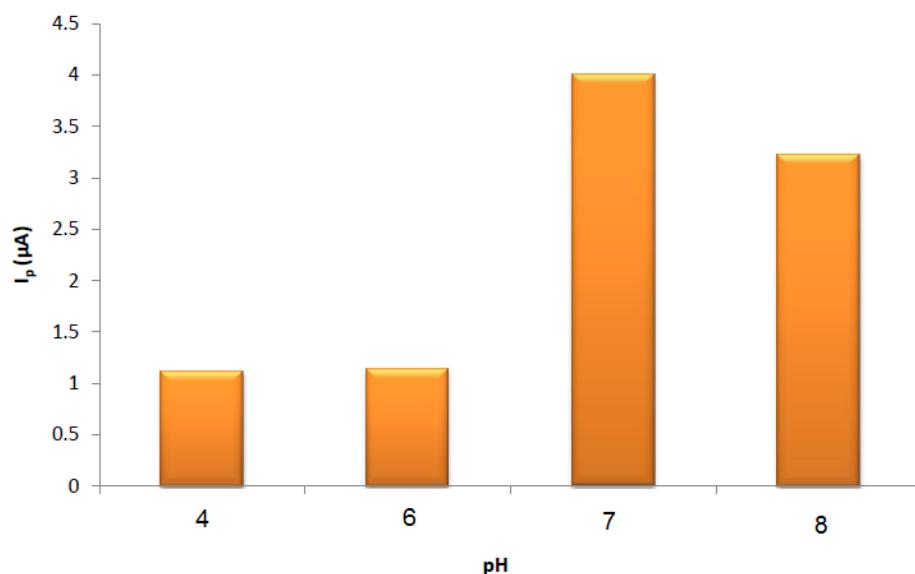

**Figure 6S.** The peak currents of aminocatechol functionalized electrode ( $A_2$  or  $C_2$ ) for the electrochemical functionalization of electrodes at various pHs; The numbers on horizontal axis refer to the solution pHs: pH=4 acetate buffer solution 0.1 M, pH=6-8 phosphate buffer solutions with various  $\text{NaH}_2\text{PO}_4/\text{Na}_2\text{HPO}_4$  and ionic strength 0.1 M.

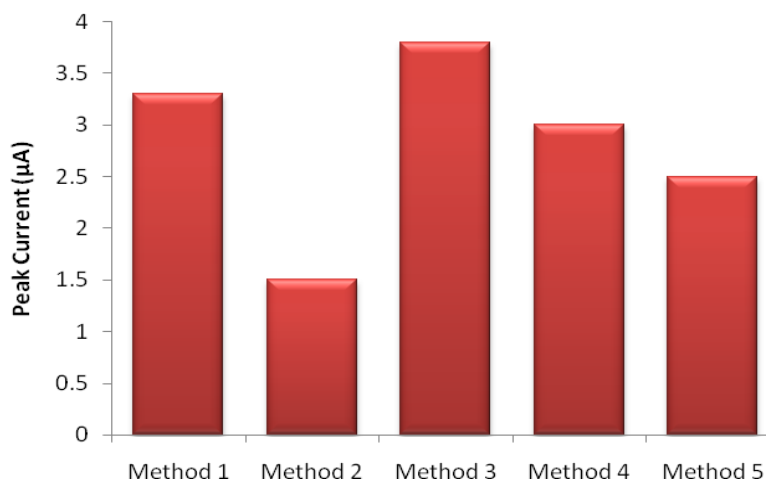

**Figure 7S.** The peak currents ( $A_2$  or  $C_2$ ) for various methods of extraction. The methods refer to the method of surfactant extraction: Method 1: extraction in ethanol, Method 2: extraction in acidic ethanol, Method 3 extraction in acidic ethanol and 10 minutes remaining in pH 7 phosphate buffer solution, Method 4: extraction in aqueous phosphate buffer, Method 5, extraction in aqueous acetate solution.

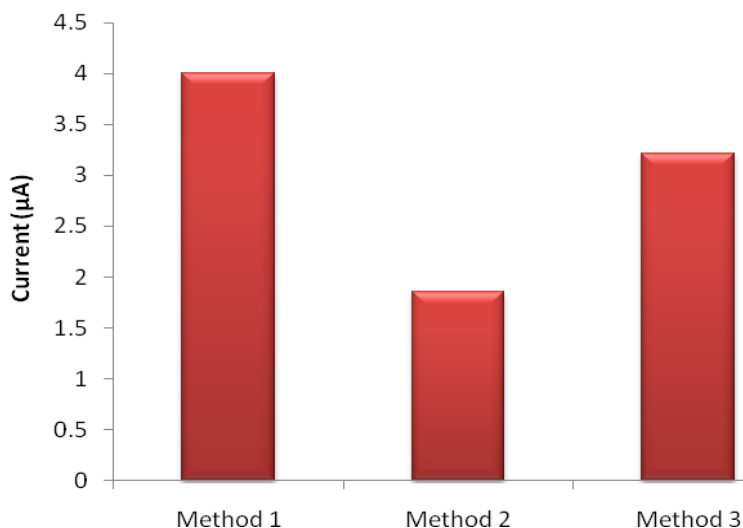

**Figure 8S.** The peak currents ( $A_2$  or  $C_2$ ) for various methods of electrochemical functionalization. The methods refer to the method of applying potential to the electrode in 0.1 M phosphate buffer and 5.0 mM catechol solution: Method 1: 50 potentiodynamic cycle method in potential range of -0.2 V to 0.7 V vs. Ag/AgCl; Method 3: double steps potentiostatic: 20 minutes potentiostatic at 0.5 followed by 10 minutes potentiostatic at -0.2 V.

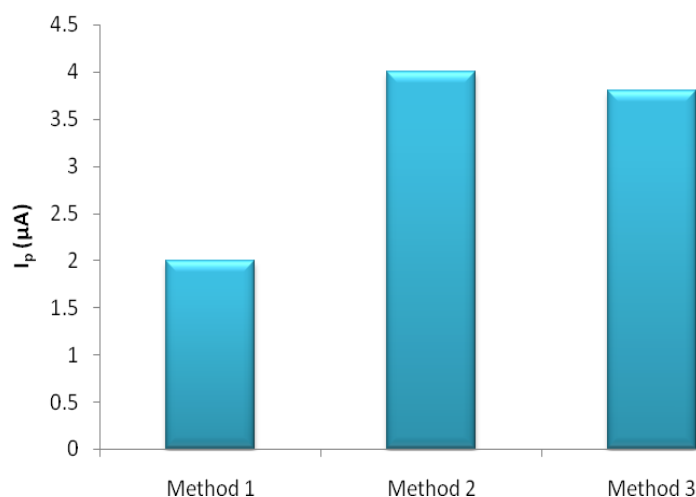

**Figure 9S.** The peak currents of modified electrode ( $A_2$  or  $C_2$ ) for various conditions of potentiodynamic functionalization. The methods refer to the number of cycles and scan rates of modification step in 0.1 M phosphate buffer and 5.0 mM catechol solution: Method 1: 20 potentiodynamic cycle method in potential range of -0.2 V to 0.7 V vs. Ag/AgCl with scan rate  $25 \text{ mVs}^{-1}$ ; Method 2: 100 cycles with scan rate  $100 \text{ mVs}^{-1}$ ; Method 3: 500 cycles with scan rate  $500 \text{ mVs}^{-1}$ ;

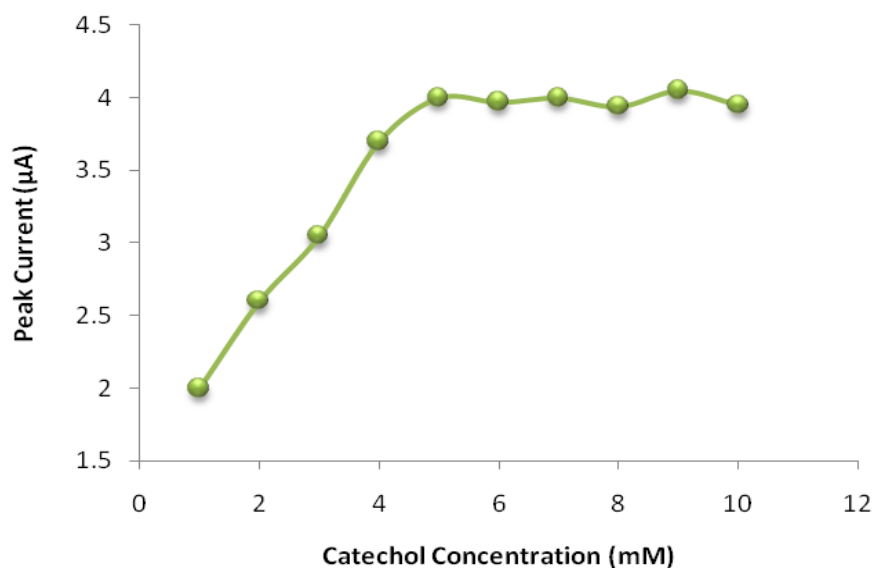

**Figure 10S.** The plot of anodic peak currents of electrochemically functionalized electrode versus concentration of catechol in phosphate buffer solution, pH =7 (solution of electrochemical modification step)

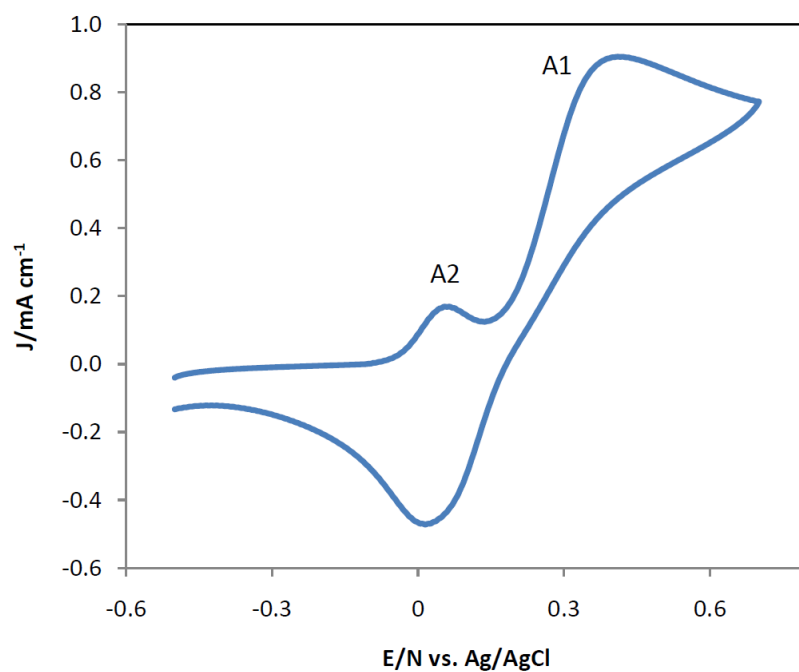

**Figure 11S:** Cyclic voltammogram of 5.0 mM solution of catechol on electrochemically functionalized GC-AFS.



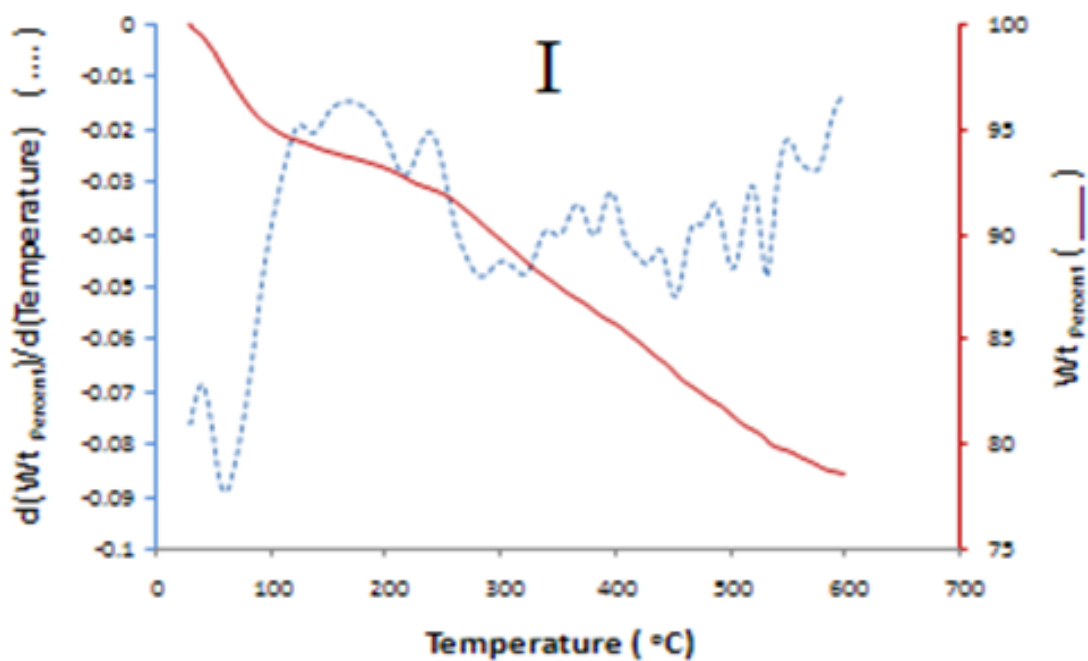

**Figure 12S:** Thermogravimetric analysis (TGA) of scratched amine functionalized silica thin film.

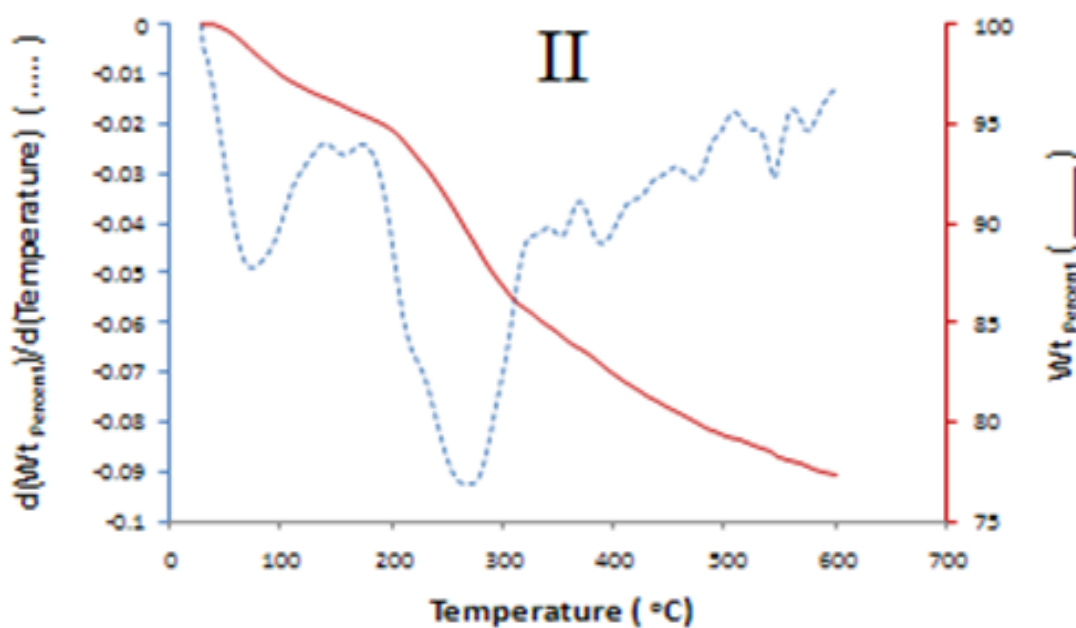

**Figure 13S:** Thermogravimetric analysis (TGA) of scratched aminocatechol functionalized silica thin film.



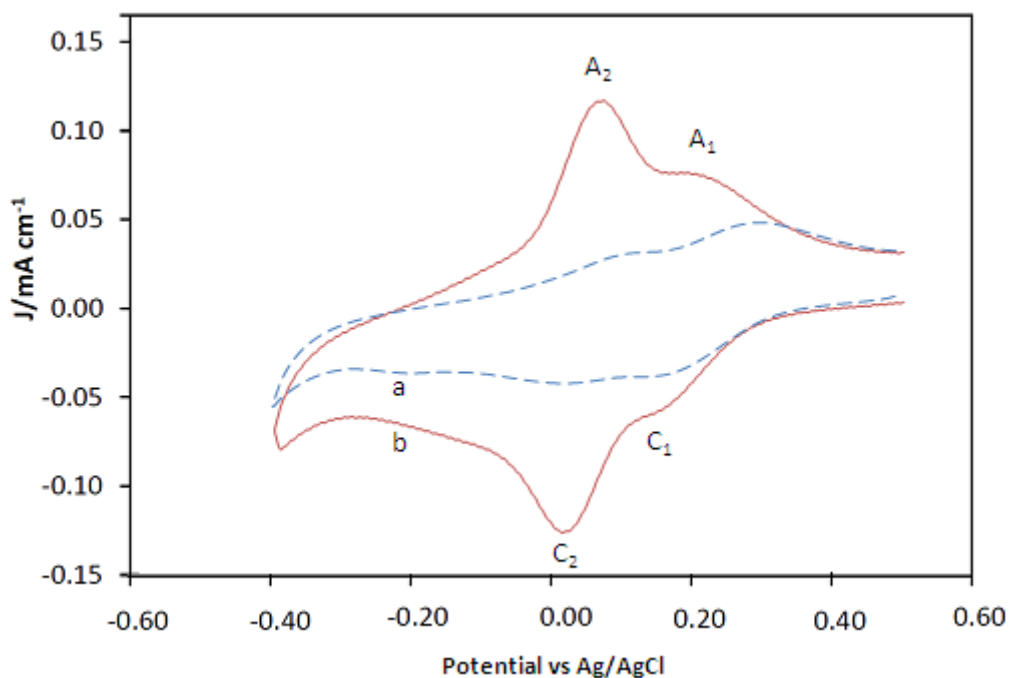

**Figure 14S.** The cyclic voltammograms of modified electrodes with ordered mesoporous silica film (only TEOS in sol solution) and aminopropyl functionalized silica film after electrochemical functionalization in 0.1 M phosphate buffer (pH=7.0) solution. The electrochemical functionalizations were achieved for both electrodes in obtained optimum conditions.

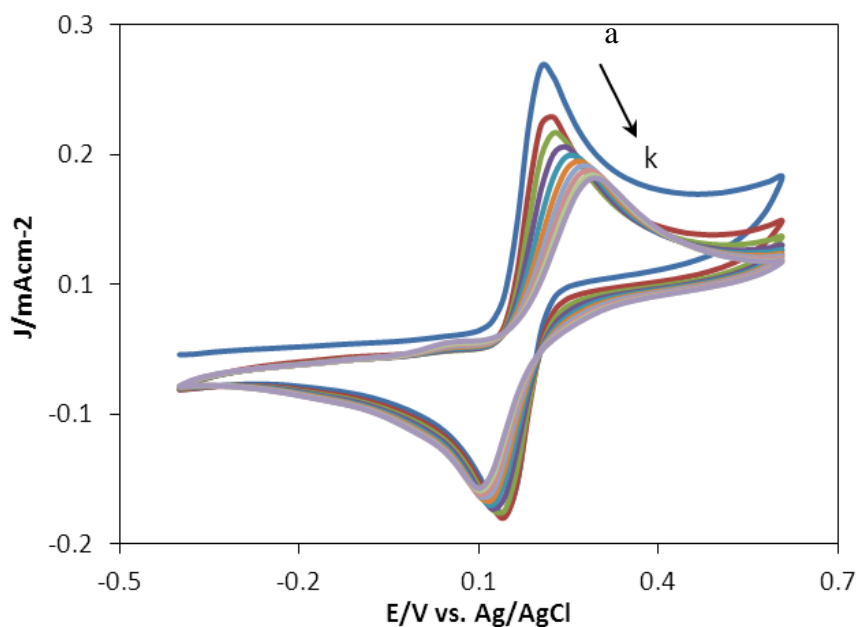

**Figure 15S.** Multicyclic voltammograms of 1.0 mM catechol in phosphate buffer solution, pH=7, on GC electrode. The cycles from (a) to (k) are the first to 100th cycle with 10 cycles interval. Scan rate: 100 mVs<sup>-1</sup>.

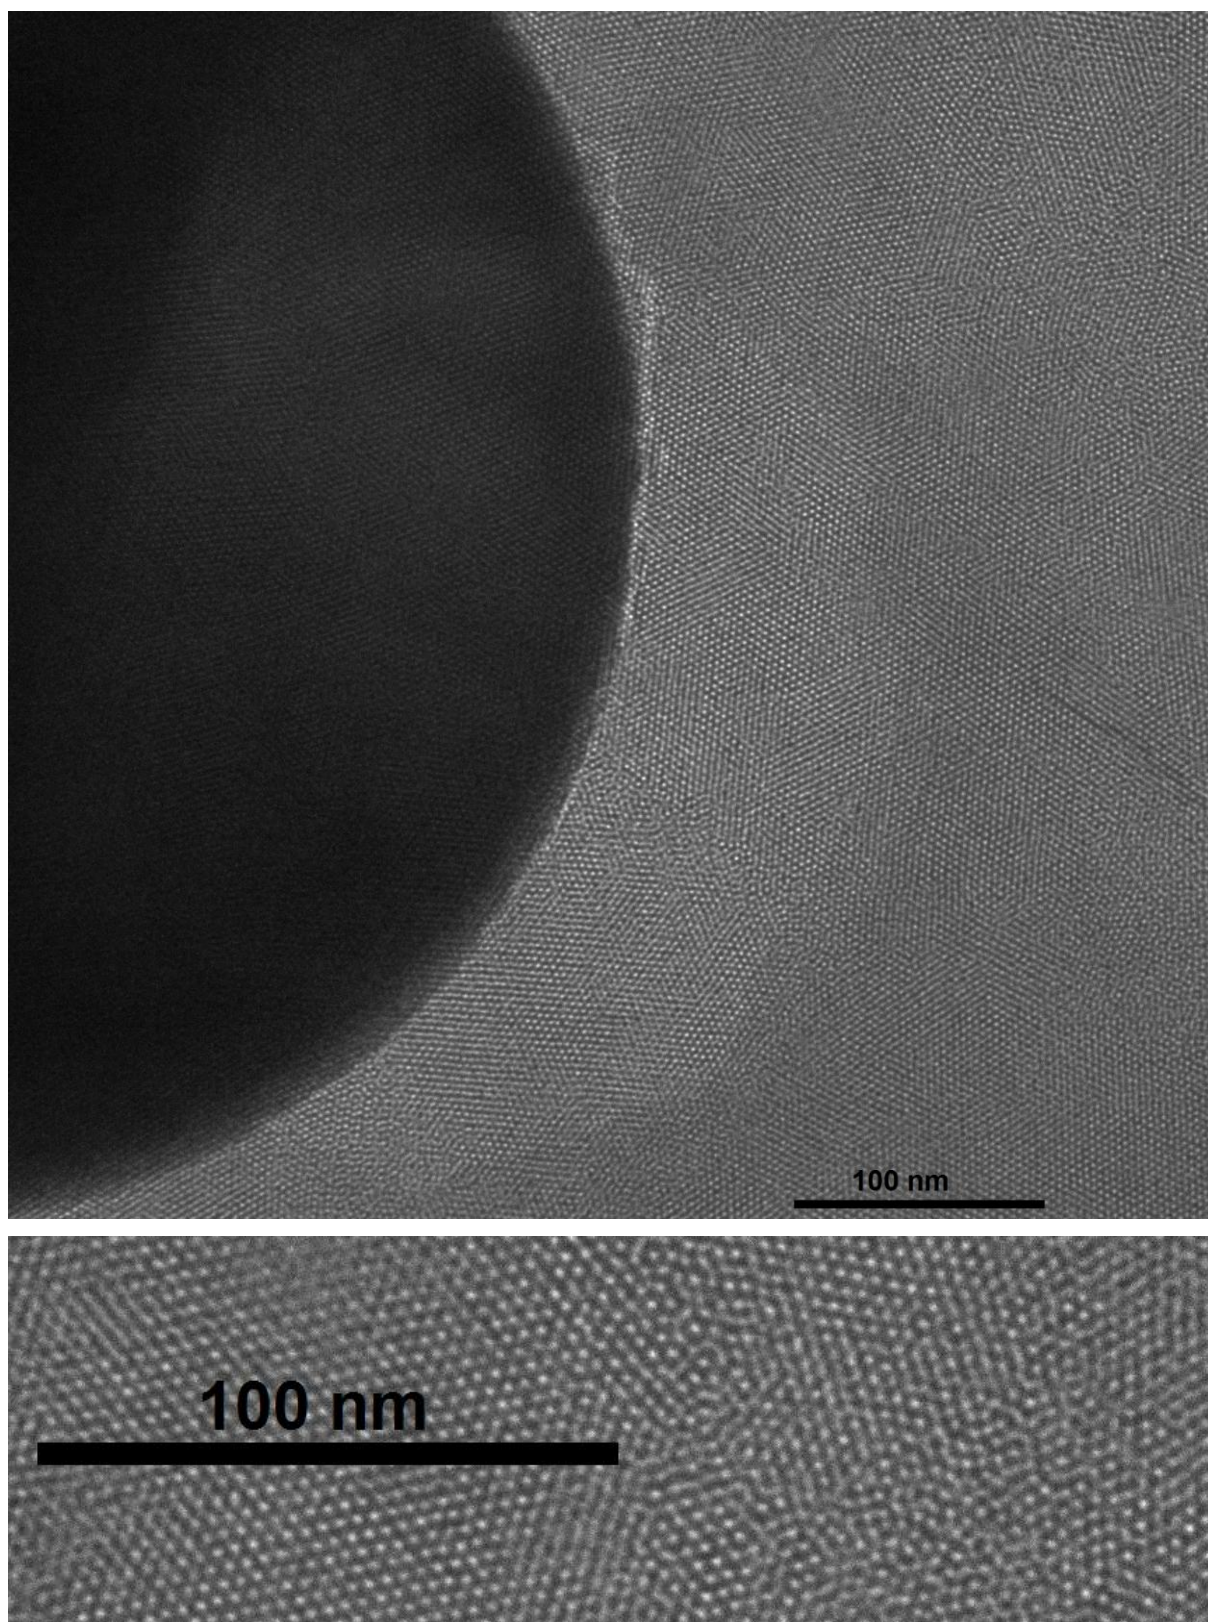

**Figure 16S.** Top-view TEM images of aminocatechol functionalized mesoporous silica film after surfactant extraction, activation (deprotonation of ammonium group) and electrochemical functionalization.

**Table 1S:** the elemental analysis of scratched films: **sample 1** silica thin film, **Sample 2:** Amine functionalized silica thin film (obtained from sol solution containing APTS/TEOS=0.1 and **Sample 3** Aminocatechol functionalized silica thin film. All of the films obtained by EASA on the activated Glassy carbon electrode.

| Sample NO. | Weight [mg] | Content [%]                              |
|------------|-------------|------------------------------------------|
| 1          | 1.8490      | N:0.000<br>C:4.486<br>S:0.000<br>H:1.117 |
| 2          | 2.1730      | N:1.305<br>C:6.985<br>S:0.000<br>H:1.772 |
| 3          | 4.9890      | N:1.080<br>C:7.894<br>S:0.000<br>H:1.873 |
